# Supplementary material for: The relation between birthweight, childhood body mass index, and overweight and obesity in late adolescence: a longitudinal cohort study from Norway, The Tromsø Study, Fit Futures
Source: PubMed Central journal article supplement — BMJ Open. 2017 Jun 22;7(6):e015576. doi: 10.1136/bmjopen-2016-015576 (PMC5734247; doi:10.1136/bmjopen-2016-015576), 2017-06-22
Supplement: bmjopen-2016-015576supp006.pdf [file bmjopen-2016-015576supp006.pdf]

Supplementary Table S.1. Comparison of the dataset with observed data and the dataset with imputed values (20 multiple imputations) for selected variables for girls and boys of the Fit Futures cohort at birth and four ages up to 18-20 years, The Tromsø Study, Fit Futures

| Characteristics                      | Girls                      |         |                           |         | Boys                       |         |                           |         |
|--------------------------------------|----------------------------|---------|---------------------------|---------|----------------------------|---------|---------------------------|---------|
|                                      | Observed data <sup>1</sup> |         | Imputed data <sup>2</sup> |         | Observed data <sup>1</sup> |         | Imputed data <sup>2</sup> |         |
|                                      | Mean/n                     | (SD)/%  | Mean/n                    | (SD)/%  | Mean/n                     | (SD)/%  | Mean/n                    | (SD)/%  |
| <b>Birth</b>                         |                            |         |                           |         |                            |         |                           |         |
| Birthweight (grams)                  | 3454.8                     | (576.7) | 3450.5                    | (574.8) | 3601.0                     | (590.0) | 3603.0                    | (586.7) |
| Birth length (cm)                    | 49.4                       | (2.3)   | 49.3                      | (2.4)   | 50.2                       | (2.3)   | 50.1                      | (2.3)   |
| Gestational age (weeks)              | 39.7                       | (1.8)   | 39.8                      | (1.8)   | 39.6                       | (2.1)   | 39.6                      | (2.1)   |
| Ponderal index (kg/m <sup>3</sup> )  | 28.73                      | (2.81)  | 28.65                     | (2.88)  | 28.45                      | (2.75)  | 28.40                     | (2.78)  |
| Body mass index (kg/m <sup>2</sup> ) | 14.19                      | (1.49)  | 14.12                     | (1.55)  | 14.28                      | (1.52)  | 14.24                     | (1.54)  |
| Birthweight SDS <sup>3</sup>         | -0.58                      | (1.74)  | -0.58                     | (1.73)  | -0.24                      | (1.32)  | -0.24                     | (1.31)  |
| Body mass index SDS <sup>3</sup>     | 0.06                       | (1.05)  | 0.01                      | (1.12)  | -0.02                      | (1.04)  | -0.46                     | (1.06)  |
| Birthweight group:                   |                            |         |                           |         |                            |         |                           |         |
| Low birthweight (<2500 g)            | 20                         | 4.5 %   | 22                        | 5.0 %   | 17                         | 3.6 %   | 17                        | 4.0 %   |
| Normal birthweight (2500-4500 g)     | 412                        | 93 %    | 436                       | 93.0 %  | 423                        | 90.0 %  | 444                       | 90.0 %  |
| High birthweight (≥4500 g)           | 11                         | 2.5 %   | 11.5                      | 2.0 %   | 30                         | 6.4 %   | 31                        | 6.0 %   |
| Small for gestational age            | 49                         | 11.1%   | 64                        | 13.5 %  | 46                         | 9.8%    | 53                        | 10.8 %  |
| Appropriate for gestational age      | 356                        | 80.4%   | 361                       | 77.1 %  | 375                        | 79.8%   | 385                       | 78.3 %  |
| Large for gestational age            | 38                         | 8.6%    | 44                        | 9.4 %   | 49                         | 10.4%   | 54                        | 10.9 %  |
| Maternal age at birth                | 28.4                       | (5.3)   | 28.4                      | (5.3)   | 28.1                       | (5.3)   | 28.1                      | (5.3)   |
| <b>2-4 years of age</b>              |                            |         |                           |         |                            |         |                           |         |
| Age (years)                          | 2.6                        | (0.4)   | 2.5                       | (0.3)   | 2.6                        | (0.4)   | 2.6                       | (0.3)   |
| Height (cm)                          | 91.2                       | (4.6)   | 91.0                      | (4.4)   | 92.7                       | (4.7)   | 92.7                      | (4.4)   |
| Weight (kg)                          | 13.5                       | (1.7)   | 13.4                      | (1.6)   | 14.1                       | (1.8)   | 14.1                      | (1.7)   |
| Body mass index (kg/m <sup>2</sup> ) | 16.17                      | (1.39)  | 16.17                     | (1.38)  | 16.37                      | (1.30)  | 16.36                     | (1.31)  |
| Weight SDS <sup>1</sup>              | -0.12                      | (1.11)  | -0.13                     | (1.12)  | 0.16                       | (1.16)  | 0.17                      | (1.15)  |
| Body mass index SDS <sup>3</sup>     | 0.04                       | (1.17)  | 0.03                      | (1.17)  | -0.07                      | (1.07)  | -0.08                     | (1.09)  |
| <b>5-7 years of age</b>              |                            |         |                           |         |                            |         |                           |         |
| Age (years)                          | 6.0                        | (0.4)   | 6.0                       | (0.4)   | 6.1                        | (0.4)   | 6.1                       | (0.4)   |
| Height (cm)                          | 116.7                      | (5.3)   | 116.4                     | (5.1)   | 118.3                      | (5.3)   | 118.2                     | (5.2)   |
| Weight (kg)                          | 21.8                       | (3.8)   | 21.6                      | (3.5)   | 22.2                       | (3.5)   | 22.1                      | (3.3)   |
| Body mass index (kg/m <sup>2</sup> ) | 15.96                      | (2.04)  | 15.88                     | (1.94)  | 15.82                      | (1.74)  | 15.81                     | (1.72)  |
| Weight SDS <sup>1</sup>              | 0.0004                     | (1.10)  | -0.05                     | (1.05)  | 0.11                       | (1.02)  | 0.11                      | (0.99)  |
| Body mass index SDS <sup>3</sup>     | -0.06                      | (1.10)  | -0.10                     | (1.09)  | -0.03                      | (0.98)  | -0.03                     | (1.00)  |
| <b>15-17 years of age</b>            |                            |         |                           |         |                            |         |                           |         |
| Age (years)                          | 16.6                       | (0.4)   | -                         | -       | 16.6                       | (0.4)   | -                         | -       |
| Height (cm)                          | 164.9                      | (6.5)   | 164.9                     | (6.5)   | 176.9                      | (6.7)   | -                         | -       |
| Weight (kg)                          | 60.9                       | (11.5)  | 60.9                      | (11.4)  | 70.2                       | (14.4)  | -                         | -       |
| Body mass index (kg/m <sup>2</sup> ) | 22.39                      | (3.96)  | 22,39                     | (3.95)  | 22.38                      | (4.17)  | -                         | -       |
| <b>18-20 years of age</b>            |                            |         |                           |         |                            |         |                           |         |
|                                      |                            |         |                           |         | No imputed values          |         |                           |         |
| Age (years)                          | 18.6                       | (0.4)   | -                         | -       | 18.7                       | (0.3)   | -                         | -       |
| Height (cm)                          | 165.7                      | (6.5)   | -                         | -       | 179.1                      | (6.5)   | -                         | -       |
| Weight (kg)                          | 63.2                       | (12.0)  | -                         | -       | 75.2                       | (14.6)  | -                         | -       |
| Body mass index (kg/m <sup>2</sup> ) | 23.02                      | (4.22)  | -                         | -       | 23.42                      | (4.18)  | -                         | -       |

<sup>1</sup> In observed data n is varying from 659-961 (328-469 girls and 296-492 boys)

<sup>2</sup> Dataset with 20 imputations n= 961(469 girls and 492 boys) in each imputations.

<sup>3</sup> SDS= Standard deviation scores according to Norwegian reference data.[23]

SD = Standard deviation

- = No imputed values, mean and SD are equal to the observed data.
