# Supplementary material for: The relation between birthweight, childhood body mass index, and overweight and obesity in late adolescence: a longitudinal cohort study from Norway, The Tromsø Study, Fit Futures
Source: PubMed Central journal article supplement — BMJ Open. 2017 Jun 22;7(6):e015576. doi: 10.1136/bmjopen-2016-015576 (PMC5734247; doi:10.1136/bmjopen-2016-015576), 2017-06-22
Supplement: bmjopen-2016-015576supp008.pdf [file bmjopen-2016-015576supp008.pdf]

Supplementary table S.3. Distribution of missing data (%) total, by gender and weight classes in two categories at Fit Futures 1 and 2. The Tromsø Study, Fit Futures

| Main variables with missing | Weight class in two categories |                          |                         |                          |                         |                    |               |                         |                          |
|-----------------------------|--------------------------------|--------------------------|-------------------------|--------------------------|-------------------------|--------------------|---------------|-------------------------|--------------------------|
|                             | Total <sup>1</sup>             | Girls <sup>2</sup>       |                         |                          |                         | Boys <sup>2</sup>  |               |                         |                          |
|                             |                                | 15-17 years              |                         | 18-20 years              |                         | 15-17 years        |               | 18-20 years             |                          |
|                             | Normal weight                  | Overweight Obesity       | Normal weight           | Overweight Obesity       | Normal weight           | Overweight Obesity | Normal weight | Overweight Obesity      |                          |
| Birthweight                 | 5.0                            | 5.9                      | 4.2                     | 5.9                      | 4.0                     | 4.5                | 4.4           | 3.8                     | 3.6                      |
| Length at birth             | 9.2                            | <i>12.4</i> <sup>3</sup> | <i>4.2</i> <sup>3</sup> | <i>12.2</i> <sup>4</sup> | <i>6.6</i> <sup>4</sup> | 7.7                | 7.8           | <i>5.2</i> <sup>5</sup> | <i>10.8</i> <sup>5</sup> |
| Gestational age             | 14.4                           | 16.4                     | 15.6                    | 16.0                     | 14.5                    | 12.2               | 13.9          | 12.7                    | 10.8                     |
| BMI 2-4 year                | 29.5                           | 30.7                     | 27.1                    | 28.6                     | 26.3                    | 28.9               | 28.7          | 25.8                    | 27.7                     |
| BMI 5-7 year                | 23.4                           | 26.4                     | 18.8                    | 23.3                     | 17.1                    | 20.7               | 26.1          | 18.3                    | 20.5                     |

<sup>1</sup> % total missing among 961 cases.

<sup>2</sup> No significant difference between girls and boys in distribution of total missing for each of the five variables. Birthweight: girls, 5.5 % boys, 4.5 %; Length at birth: girls, 10.7% boys, 7.7%; Gestational age: girls, 16.2% boys 12.6%; BMI 2-4 years: girls, 30.1 boys, 28.9; BMI 5-7 years: girls 25.0% boys 22.0%.

<sup>3</sup> Chi-square test, p=0.02 Significant differences between weightclasses in *Italic*.

<sup>4</sup> Chi-square test, p=0.16

<sup>5</sup> Chi-square test, p=0.08

BMI, Body mass index kg/m<sup>2</sup>
